# Supplementary material
Source: PubMed Central journal article supplement (PMC4226347)
Supplement: supp_pp.114.247148_247148supp.pdf [file supp_pp.114.247148_247148supp.pdf]

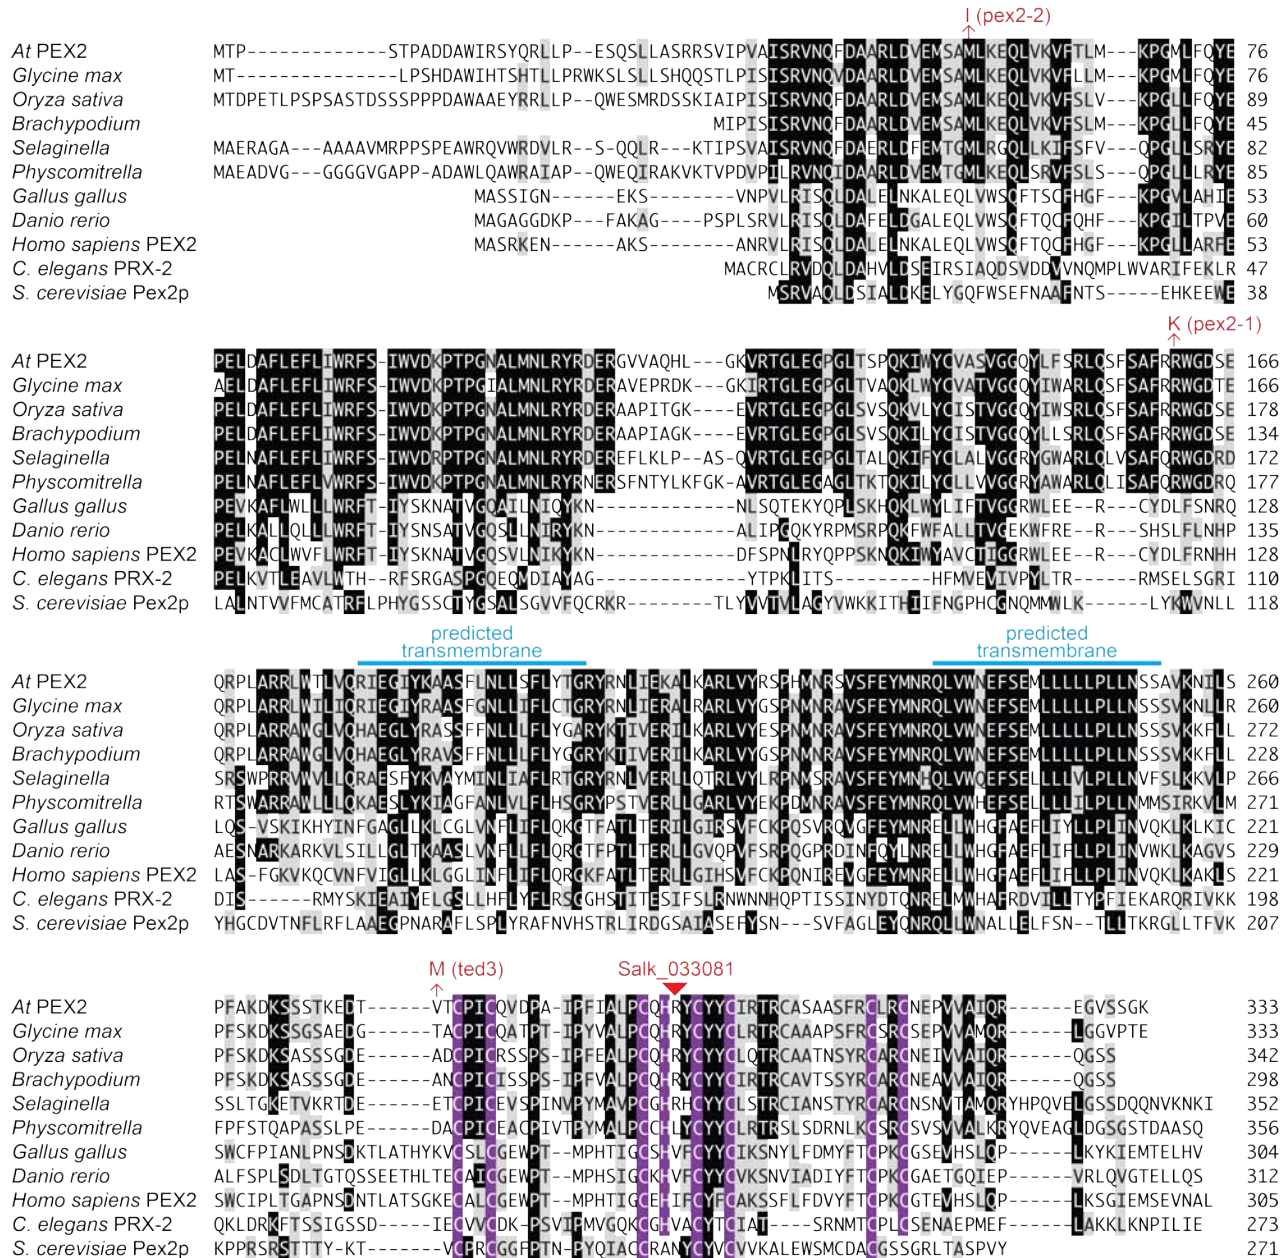

**Supplemental Figure S1.** Alignment of PEX2 proteins from various organisms. *Arabidopsis* (*At*) PEX2 (At1g79810) was aligned with homologs from *Glycine max* (XP\_003530138.1), *Oryza sativa* (Os05g0275700), *Brachypodium distachyon* (XP\_003573500.1), *Selaginella moellendorffii* (XP\_002976539.1), *Physcomitrella patens* (XP\_001781834.1), *Gallus gallus* (NP\_001008454.1), *Danio rerio* (XP\_684073.2), *Homo sapiens* (NP\_000309.1), *Caenorhabditis elegans* (CAA92640.2), and *Saccharomyces cerevisiae* (NP\_012325.1). The alignment was generated using Lasergene MegAlign (DNASTAR, Madison, WI) with the Clustal W default settings and the Gonnet series protein weight matrix. Residues identical in at least six sequences are shaded in black or purple; chemically similar residues are shaded in gray. Transmembrane domains predicted using the ARAMEMNON database (Schwacke et al., 2003) are indicated in blue, metal-coordinating residues of the RING-finger domain are highlighted in purple, and positions of *Arabidopsis* *pex2* mutants are indicated in red.

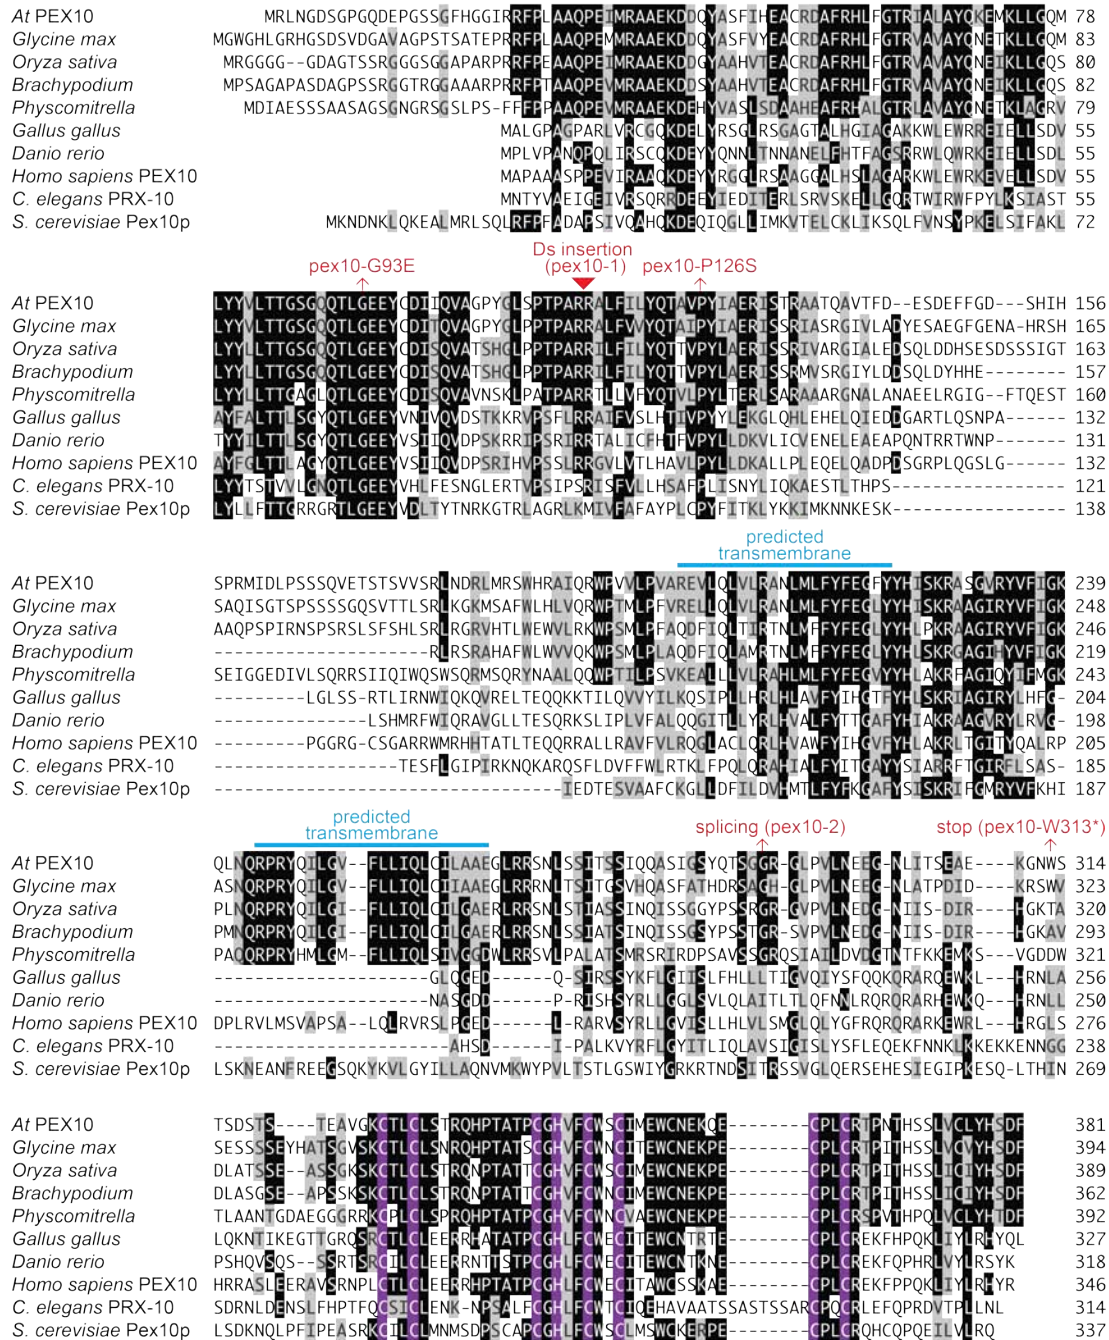

**Supplemental Figure S2.** Alignment of PEX10 proteins from various organisms. *Arabidopsis* (At) PEX10 (At2g26350) was aligned with homologs from *Glycine max* (XP\_003544551.1), *Oryza sativa* (Os07g0608800), *Brachypodium distachyon* (XP\_003559973.1), *Physcomitrella patens* (XP\_001777562.1), *Gallus gallus* (NP\_001185583.1), *Danio rerio* (NP\_001005994.1), *Homo sapiens* (NP\_722540.1), *Caenorhabditis elegans* (NP\_001021200.2), and *Saccharomyces cerevisiae* (NP\_010551.1). The alignment was generated using Lasergene MegAlign (DNASTAR, Madison, WI) with the Clustal W default settings and the Gonnet series protein weight matrix. Residues identical in at least five sequences are shaded in black or purple; chemically similar residues are shaded in gray. Transmembrane domains predicted using the ARAMEMENON plant membrane protein database (Schwacke et al., 2003) are indicated in blue, metal-coordinating residues of the RING-finger domain are highlighted in purple, and positions of *Arabidopsis pex10* mutants are indicated in red.



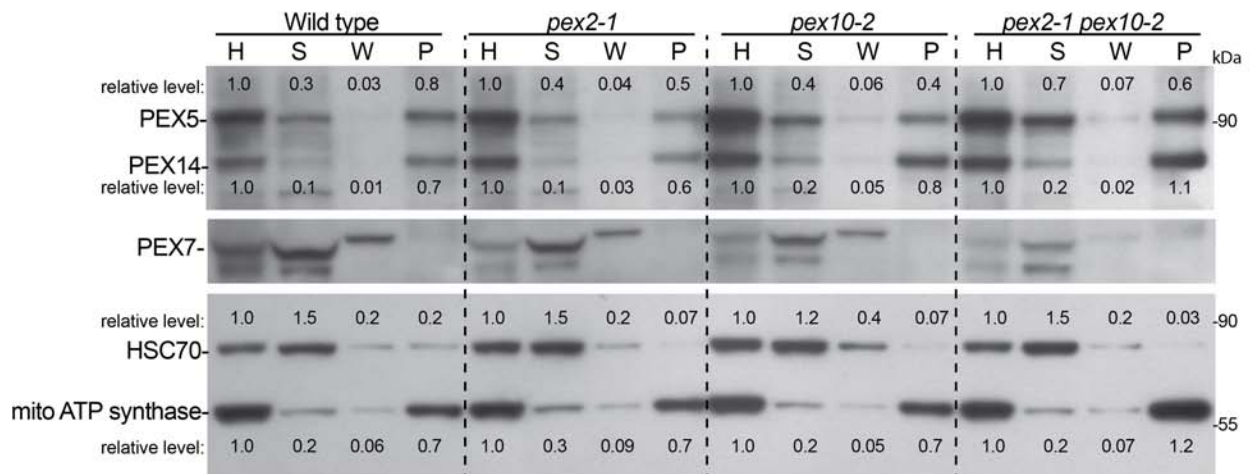

**Supplemental Figure S3.** Membrane association of peroxisome matrix protein receptors in *pex2-1*, *pex10-2*, and *pex2-1 pex10-2*.

Light-grown 8-d-old seedlings were homogenized and the resultant extracts were centrifuged to separate soluble proteins from proteins associated with organellar membranes. Homogenate (H), soluble (S), wash (W) and pellet (P) fractions were processed for immunoblotting and serially probed with the indicated antibodies. HSC70 and mitochondrial membrane complex V (mito ATP synthase) were used as cytosolic and organellar controls, respectively. Numbers above or below the bands indicate the relative level of the indicated protein in the S, W, or P fraction relative to the amount in the H fraction. This experiment was repeated three times with similar results.

Supplemental **Table 1.** *Markers used in recombination mapping of pex2-1 and pex10-2*

| Marker   | Nearest gene     | Restriction enzyme | Fragment size (bp) |            | Primer sequences                                                   |
|----------|------------------|--------------------|--------------------|------------|--------------------------------------------------------------------|
|          |                  |                    | Col-0              | Ler        |                                                                    |
| LCS1127  | <i>At1g32130</i> | <i>TaqI</i>        | 206                | 138, 68    | CAAAATCCTGAAGTGGCTCTGTAG<br>ATTTTCGATTTTCGTTTTTGTG                 |
| T14L22   | <i>At1g51913</i> | <i>HinfI</i>       | ~700               | ~450, ~250 | GAAAAATTAAAGCCCAACC<br>CACCCGCAAACACAACAACC                        |
| SNP10592 | <i>At1g69250</i> | <i>RsaI</i>        | 115, 29            | 144        | AGCGACGGCAACCTAAAAAAGTAAAG<br>AGGTTCAAGCACATTGATGATACTCTGTA        |
| SEC238   | <i>At2g18950</i> | <i>DdeI</i>        | 145, 69            | 214        | GAGTTCTGCGTTGTGATTCGAGTAAAGTTG<br>GAAAACCTGTAAAACGCATCTAACGAGTC    |
| SEC241   | <i>At2g20770</i> | <i>PvuII</i>       | 177, 27            | 204        | CAACTCAAACCTTATTCACCATCAAACAACAA<br>TATCTCTTCCTTGACATGGTCGACCCAGCT |
| SEC244   | <i>At2g25095</i> | <i>AvaII</i>       | 197, 28            | 225        | TAAAAATAGTAAACTTGTCCCGATAAA<br>GTCGATAGATTACGGACGTATTAGAAAGG       |
| SEC245   | <i>At2g28360</i> | <i>RsaI</i>        | 116, 28            | 144        | CTGCAGCTTCGTTTCTAGGATATTTGGTCAT<br>CTATAAGAATTGAAGAAAGGCGATGAAGTA  |
| SEC246   | <i>At2g32340</i> | <i>RsaI</i>        | 114, 27            | 141        | TTTACCTGTTCCGCCAATCACTCCTC<br>GAACCTGCGTCGCTATCTGCTTCCTCCGTA       |

**Supplemental Table 2.** *Primers used for amplification and sequencing of PEX2 and PEX10*

| Gene/Accession #       | Primer names | Primer sequences                 |
|------------------------|--------------|----------------------------------|
| <i>PEX2/At1g798100</i> | PEX2-12 and  | CATGGATGAATCTCTGTGGGTGTGA        |
|                        | PEX2-13      | GAAAGAAAAAGAAGAGTAGCGGAAGTGAGAA  |
|                        | PEX2-14 and  | TCGCTATGGTTGATTCTTTTCTCCTT       |
|                        | PEX2-15      | GCTGCTTGCCTTGGCTTTTTTACACTTC     |
| <i>PEX10/At2g26350</i> | PEX10-3 and  | GACCACCTAACATCTCCAACCTCTTTT      |
|                        | PEX10-4      | ATGGCCACTCGACTGATCCCGCTCTAC      |
|                        | PEX10-5 and  | AAGGAGTGGCCGTTGGGTGCTGAC         |
|                        | PEX10-6      | TTCTTGGGGTTTTTCCTTCTAATC         |
|                        | PEX10-7 and  | CCTATAGAAGCCTGCTGAATGGAG         |
|                        | PEX10-8      | TCAGGGCAACAACTTTAGGAGAGGAAT      |
|                        | PEX10-9 and  | TGGAACTGCGGTCTGGTACAATATGAACAAAG |
|                        | PEX10-10     | CTTTGAATTAATAAAAAAAAAATATCAAAGGC |

Supplemental **Table 3.** PCR-based markers for determining mutant genotypes

| Mutant                         | Primer names            | Primer sequences                | Restriction enzyme | Product size (bp) |        |
|--------------------------------|-------------------------|---------------------------------|--------------------|-------------------|--------|
|                                |                         |                                 |                    | Wt                | Mutant |
| <i>pfl36/pex2-1</i>            | PEX2-18                 | TGCGTTGCCTCCGTTGGTGGTCAG        | <i>DpnII</i>       | 65, 18            | 93     |
|                                | PEX2-DpnII <sup>1</sup> | CATACAGACCTGCTCAGAATCACCCGAT    |                    |                   |        |
| <i>pex2-2</i>                  | PEX2-20                 | GCTTATTATATGTGGTCTTTGATGGCAGTC  | <i>NdeI</i>        | 134               | 102    |
|                                | PEX2-NdeI <sup>1</sup>  | GAGTGAAAACCTTAACGAGCTGTTCCCTCCA |                    |                   |        |
| <i>ted3</i>                    | TED3-1                  | ATGCTTTTGTGCTTCTCCCGCTGCTC      | <i>Tsp451</i>      | 341, 99           | 440    |
|                                | TED3-2                  | TCTAAGACACCGGAACGATGCTGCTG      |                    |                   |        |
| <i>pfl81/pex10-2</i>           | PEX10-11                | CGTTGAAGTTGAATCGGAGGTAGAC       | <i>PstI</i>        | 92, 28            | 120    |
|                                | PEX10-PstI <sup>1</sup> | AATATAGTTTTGGTATTGTTCCCTGCA     |                    |                   |        |
| <i>pex10-P126S<sup>2</sup></i> | PEX10-8                 | TCAGGGCAACAACTTTAGGAGAGGAAT     | -                  | 229               | 229    |
|                                | PEX10-TaqI              | ACGAAACCTAATTCTCTCTGCGATATATC   |                    |                   |        |

<sup>1</sup>dCAPS oligonucleotide (Michaels and Amasino, 1998; Neff et al., 1998); the underlined nucleotide differs from wild-type sequence to create a restriction site in either the mutant or wild-type PCR amplicon.

<sup>2</sup>*pex10-P126S* was amplified with the listed primers and sequenced with primer PEX10-8 to confirm genotype.

### Supplemental literature cited:

- Michaels SD, Amasino RM** (1998) A robust method for detecting single-nucleotide changes as polymorphic markers by PCR. *Plant J* **14**: 381-385
- Neff MM, Neff JD, Chory J, Pepper AE** (1998) dCAPS, a simple technique for the genetic analysis of single nucleotide polymorphisms: experimental applications in *Arabidopsis thaliana* genetics. *Plant J* **14**: 387-392
- Schwacke R, Schneider A, van der Graaff E, Fischer K, Catoni E, Desimone M, Frommer WB, Flugge UI, Kunze R** (2003) *ARAMEMNON*, a novel database for Arabidopsis integral membrane proteins. *Plant Physiol* **131**: 16-26
